# Supplementary material
Source: PubMed Central journal article supplement (PMC10294684)
Supplement: jb.00029-23-s0002.pdf [file jb.00029-23-s0002.pdf]

## 835 **SUPPLEMENTAL MATERIAL**

### 836 **Supplemental Materials and Methods**

837 In separate file.

### 838 **Supplementary Table 1**

839 List of strains used and origin (in separate file)

### 840 **Supplementary Table 2**

841 List of primers used (in separate file)

842

### 843 **Supplementary Figure Legends**

844 **FIG S1** Pairwise identities among F-type pyocin proteins encoded at the 3'-end of the operon.  
845 All against all pairwise percent identities for the indicated proteins are shown. Based on the  
846 comparison of homologous proteins encoded within this region, F-type pyocins were classified  
847 into 11 distinct groups, of which 6 groups were experimentally tested. The F-pyocin groups of  
848 the proteins that are being compared are indicated at the sides and top of each table. Numbers  
849 that are shaded denote groups that share Specificity Modules. The PyoF10 comparisons include  
850 only the C-terminal 60 amino acids. PyoF13 comparisons include only the last 210 residues of  
851 these proteins. The F7 group does not encode PyoF14, so these boxes are left blank. "<20"  
852 denotes sequences that could not be well aligned in a pairwise alignment. F21 and F22 refer to  
853 the duplicated PyoF13, PyoF14, and PyoF15 proteins encoded in the F2 group.

854

855 **FIG S2** Protein sequence alignments of PyoF11 and PyoF12 from each F-type pyocin group. (a)  
856 An alignment of PyoF11 homologs is shown from the 11 F-type pyocin groups and selected  
857 phages. (b) An alignment of PyoF11 homologs is shown from the 11 F-type pyocin groups and  
858 selected phages. The phage proteins are from *Burkholderia* phages KS9 (NC\_013055) and  
859 BcepGomr (NC\_009447); *P. aeruginosa* phages LIT1 (NC\_013692) and LUZ7 (NC\_013691);  
860 and *E. coli* phages T1 (NC\_005833) and N15 (NC\_001901).

861

862 **FIG S3** Protein sequence alignments of PyoF13 from each F-type pyocin group. (a) An  
863 alignment of the N-terminal 140 amino acids of PyoF13 homologs from the 11 F-type pyocin  
864 groups is shown. (b) An alignment of the C-terminal 210 amino acids of PyoF13 homologs from  
865 the 11 F-type pyocin groups is shown.

866

867 **FIG S4** Protein sequence alignments of the tail fiber proteins (PyoR6) from each R-type pyocin  
868 group. (a) An alignment of the N-terminal 450 amino acids of the PyoR6 homologs is shown. (b)  
869 An alignment of the C-terminal 250 amino acids PyoR6 homologs is shown. (c) The pairwise  
870 sequence identities of the PyoR6 N-terminal and C-terminal regions are shown. The locus tags  
871 for the proteins shown are R1 (PLES\_06171), R2 (PA14\_08050), and R5 (PA0620).

872

873 **FIG S5** The bactericidal activity of all F-type pyocin lysates tested on all of the strains used in  
874 this study. All lysates were spotted both on plates containing proteinase K and plates without  
875 proteinase K. Conclusions about pyocin types within each lysate were derived from examination  
876 of both plates. In lysates containing R- or F-type pyocin activity, S-type pyocin activity may not  
877 have been detectable in some cases because R- and F-type activity tended to be stronger and  
878 could mask the S-type activity. "NT" denotes a non-typeable serotype.

879

**Supplementary Table 1. Strains used.**

---

| Strain | Original Designation | Place of Isolation | Source      |
|--------|----------------------|--------------------|-------------|
| PA14   | PA14                 |                    | Human       |
| PAO1   | PA01                 | Australia          | Human       |
| S1     | RYC97083283          | Spain              | Human       |
| S2     | PA100420             | Canada             | Human       |
| S3     | CF040                | USA                | Human       |
| S4     | EnvJH                | Canada             | Environment |
| S5     | PA131533             | Canada             | Human       |
| S6     | RR1                  | Spain              | Environment |
| S7     | PA191517             | Canada             | Human       |
| S8     | PA4944               | Canada             | Human       |
| S9     | Env24 DJ             | Canada             | Environment |
| S10    | CECT116              | Spain              | Environment |
| S11    | Env23 DJ             | Canada             | Environment |
| S12    | EnvKY2               | USA                | Environment |
| S13    | ATCC15528            | USA                | Environment |
| S14    | EnvBC13              | Canada             | Environment |
| S15    | T4347                | Trinidad           | Human       |
| S16    | Env110 BP            | Canada             | Environment |
| S17    | Env34 DJ             | Canada             | Environment |
| S18    | 2709                 | Belgium            | Human       |
| S19    | EnvBC15              | Canada             | Environment |
| S20    | EnvBC10              | Canada             | Environment |
| S21    | ATCC15524            | USA                | Environment |
| S22    | EnvCIN1              | USA                | Environment |
| S23    | SA2                  | South Africa       | Environment |
| S24    | Env63 BP             | Canada             | Environment |
| S25    | Env25 DJ             | Canada             | Environment |
| S26    | CF049                | Canada             | Human       |
| S27    | T4826                | Trinidad           | Human       |
| S28    | PML14                | N/A                | N/A         |

---

**Supplementary Table S2. Primers used.**

| <b>Primer name</b>          | <b>Primer sequence</b>                                                                              |
|-----------------------------|-----------------------------------------------------------------------------------------------------|
| PA14 <i>pyoF11</i> -For     | CCCGGGCCATGGCCGAAGTGC GCCAGGAATGG                                                                   |
| PA14 <i>pyoF11</i> -Rev     | CCCGGGAAGCTTTCAATACACGCCATAAATCAC                                                                   |
| PA14 <i>pyoF11</i> gib-For  | TATACATACCCATGGGATCTGATAAATGAACAAGACCATCACGGGC                                                      |
| PA14 <i>pyoF12</i> gib-Rev  | ACGTTGTAAAACGACGGCCAGTGCCTTAATAACCAGTCACATCTACCA<br>CCAGATATCC                                      |
| 20T-gib-For                 | GGCACTGGCCGTCG                                                                                      |
| 20T-gib-Rev                 | TTATCAGATCCCATGGGTATGTATATCTCCTTCT                                                                  |
| PA14 <i>pyoF12</i> -For     | CCATGGCCTTGATGATTGGGTTTAAGG                                                                         |
| PA14 <i>pyoF12</i> -Rev     | CTGCAGTTAATAACCAGTCACATCTAC                                                                         |
| PA14 <i>pyoF13</i> -For     | CCCGGGGGATCCATGACTTGGTATTCCAGTGGC                                                                   |
| PA14 <i>pyoF13</i> -Rev     | CCCGGGAAGCTTTCAGTACCACCTCCCCACAGC                                                                   |
| PA14 <i>pyoF14</i> -For     | CCCGGGCCATGGCCCGTATCGAACTCAGTCC                                                                     |
| PA14 <i>pyoF14</i> -Rev     | CCCGGGAAGCTTTCACTTGGGCAACTCCACG                                                                     |
| PA14 <i>pyoF15</i> -For     | CCCGGGCCATGGCCGTGATCGATTGGAAAATG                                                                    |
| PA14 <i>pyoF15</i> -Rev     | CCCGGGAAGCTTTCAGATGCGCGGGAGCG                                                                       |
| PA14 <i>pyoF11</i> -delR    | CAGACCGACCGTCACGACAGCAATCC                                                                          |
| PA14 <i>pyoF11</i> -delF    | GGAGATGTAATTTTCATGGGACTTTCCCGG                                                                      |
| PA14 <i>pyoF11</i> rec-F    | CCCGGGGAATTCGATACCGTCAGCGCGCACCGATA                                                                 |
| PA14 <i>pyoF11</i> rec-R    | CCCGGGAAGCTTATATCTTGAGTCATACACAACACCGCC                                                             |
| PA14CR <i>pyoF11</i> -del-F | CATGGGTTCACTGCCGTGTAGGCAGCTAAGAAAGATTTTTCGTCCGGT<br>TCTGGGTGGGCTTGATCGTTCAGTCCGTGTAGGCAGCTAAGAAAA   |
| PA14CR <i>pyoF11</i> -del-R | AGCTTTTTCTTAGCTGCCTACACGGCAGTGAACGATGCAAGCCCACCC<br>AGAACCCGACGAAAAATCTTTCTTAGCTGCCTACACGGCAGTGAACC |
| PA14 <i>pyoF13</i> -rec-F   | CCCGGGGAATTCAACTCTGGCCGTTGATGG                                                                      |
| PA14 <i>pyoF13</i> rec-R    | CCCGGGCTGCAGGTCCCCACGATATTGTCT                                                                      |
| PA14 <i>pyoF13</i> sdm-F    | ATTCCAGTGGCACCTGAGCGGTGACCGCAAAT                                                                    |
| PA14 <i>pyoF13</i> sdm-R    | ATTTGCGGTCACCGCTCAGGTGCCACTGGAAT                                                                    |
| PA14CR <i>pyoF13</i> -sdm-F | CATGGGTTCACTGCCGTGTAGGCAGCTAAGAAAGTAGCGGTGACCGCA<br>AATAGCCCGACCGTTACGTTCACTGCCGTGTAGGCAGCTAAGAAAA  |
| PA14CR <i>pyoF13</i> -sdm-R | AGCTTTTTCTTAGCTGCCTACACGGCAGTGAACGTAACGGTCCGGGCTA<br>TTTGCGGTCACCGCTACTTTCTTAGCTGCCTACACGGCAGTGAACC |
| SS633                       | TTGTATTTCCAGGGCTCCTCTGGTTCAACAGTTCCAG                                                               |
| SS635                       | CGGTACCCACTCACCAGTCCTTAAACCCAATCATCAA                                                               |
| SS636                       | GAACCGAACAGGCTTATGTCAATTTATCTGGTGGTAGATGTGAC                                                        |
| SS634                       | CAAGCTTCGTCAATCAAGCGGGTACTGGCGTCAATAAC                                                              |
| SS639                       | TCCTCTGGTTCAACAGTTCCAGC                                                                             |
| SS640                       | AGCGGGTACTGGCGTCAATAAC                                                                              |

|                             |                                                                                                     |
|-----------------------------|-----------------------------------------------------------------------------------------------------|
| SS545                       | ACTGGTGAGTGGGTACCG                                                                                  |
| SS546                       | AATTGACATAAGCCTGTTTCGGTTC                                                                           |
| PA14 <i>pyoR1</i> -rec-F    | CCCGGGCCATGGCCCCTGAACAGGCTGTTACG                                                                    |
| PA14 <i>pyoR2</i> -rec-R    | CCCGGGAAGCTTTCAATGGGTGTGGTGGTTGCT                                                                   |
| PA14 <i>pyoR2</i> sdm-F     | GCGGAGCATGACCGCTAGCTCGCCGCGATGAT                                                                    |
| PA14 <i>pyoR2</i> sdm-R     | ATCATCGCGGCGAGCTAGCGGTCATGCTCCGC                                                                    |
| PA14CR <i>pyoR2</i> -del-F  | CATGGGTTCACTGCCGTGTAGGCAGCTAAGAAAGCATGCTCGCCGCGA<br>TGATCCTGCCCTGCGTGGGTTCACTGCCGTGTAGGCAGCTAAGAAAA |
| PA14CR <i>pyoR2</i> -del-R  | AGCTTTTTCTTAGCTGCCTACACGGCAGTGAACCCACGCAGGGCAGGA<br>TCATCGCGGCGAGCATGCTTTCTTAGCTGCCTACACGGCAGTGAACC |
| PA14 <i>pyoF10</i> -rec-F   | CCATGGAACAACACCCAGCTCTCGGCGG                                                                        |
| PA14 <i>pyoF10</i> -rec-R   | AAGCTTCTCCACACTGCTGGCGTAGACCG                                                                       |
| PA14 <i>pyoF10</i> -del-F   | CGCGTGCTGACCGTGACCGCC                                                                               |
| PA14 <i>pyoF10</i> -del-R   | GGTCCAGGCCGACTTGAACGAGCC                                                                            |
| PA14CR <i>pyoF10</i> -del-F | CATGGGTTCACTGCCGTGTAGGCAGCTAAGAAAGCATCGCCCAGTACT<br>GCGACCAGTCGGTGCCCGGTTCACTGCCGTGTAGGCAGCTAAGAAAA |
| PA14CR <i>pyoF10</i> -del-R | AGCTTTTTCTTAGCTGCCTACACGGCAGTGAACCGGGCACCAGCTGGT<br>CGCAGTACTGGGCGATGCTTTCTTAGCTGCCTACACGGCAGTGAACC |
| SS246                       | ATGTCCATCCTGACTCAAGGTAC                                                                             |
| SS247                       | TCAAGCCGACTTCGGCGTCCAC                                                                              |

**PyoF10 (C-terminus)**

|     | F1 | F2 | F4 | F5 | F6 | F7 | F8 | F9 | F10 | F11 |
|-----|----|----|----|----|----|----|----|----|-----|-----|
| F2  | 42 |    |    |    |    |    |    |    |     |     |
| F4  | 39 | 43 |    |    |    |    |    |    |     |     |
| F5  | 31 | 28 | 33 |    |    |    |    |    |     |     |
| F6  | 36 | 28 | 60 | 32 |    |    |    |    |     |     |
| F7  | 37 | 26 | 53 | 34 | 52 |    |    |    |     |     |
| F8  | 93 | 42 | 41 | 31 | 36 | 35 |    |    |     |     |
| F9  | 26 | 26 | 31 | 47 | 41 | 38 | 26 |    |     |     |
| F10 | 43 | 43 | 97 | 36 | 60 | 57 | 44 | 31 |     |     |
| F11 | 28 | 30 | 36 | 36 | 32 | 33 | 29 | 33 | 36  |     |
| F12 | 28 | 30 | 36 | 36 | 32 | 33 | 29 | 33 | 36  | 100 |

**PyoF13 (C-terminus)**

|                 | F1  | F2 <sub>2</sub> | F4  | F5  | F6  | F7  | F8 | F9 | F10 | F11 | F12 |
|-----------------|-----|-----------------|-----|-----|-----|-----|----|----|-----|-----|-----|
| F2 <sub>2</sub> | 27  |                 |     |     |     |     |    |    |     |     |     |
| F4              | 27  | 100             |     |     |     |     |    |    |     |     |     |
| F5              | 28  | 100             | 100 |     |     |     |    |    |     |     |     |
| F6              | 100 | 27              | 27  | 27  |     |     |    |    |     |     |     |
| F7              | <20 | <20             | <20 | <20 | <20 |     |    |    |     |     |     |
| F8              | 47  | 32              | 32  | 33  | 47  | <20 |    |    |     |     |     |
| F9              | 41  | 33              | 33  | 33  | 41  | <20 | 76 |    |     |     |     |
| F10             | 51  | 30              | 30  | 31  | 51  | 19  | 51 | 43 |     |     |     |
| F11             | 28  | 100             | 100 | 100 | 28  | <20 | 33 | 33 | 30  |     |     |
| F12             | 52  | 30              | 30  | 31  | 52  | 19  | 52 | 44 | 99  | 31  |     |
| F2 <sub>1</sub> | 27  | 23              | 23  | 23  | 26  | <20 | 25 | 24 | 34  | 23  | 34  |

**PyoF11**

|     | F1  | F2  | F4 | F5  | F6 | F7  | F8 | F9  | F10 | F11 |
|-----|-----|-----|----|-----|----|-----|----|-----|-----|-----|
| F2  | 30  |     |    |     |    |     |    |     |     |     |
| F4  | 20  | 22  |    |     |    |     |    |     |     |     |
| F5  | 19  | 22  | 28 |     |    |     |    |     |     |     |
| F6  | 24  | <20 | 35 | 30  |    |     |    |     |     |     |
| F7  | 24  | 19  | 22 | <20 | 16 |     |    |     |     |     |
| F8  | 93  | 32  | 22 | 18  | 21 | 23  |    |     |     |     |
| F9  | 26  | 24  | 24 | 23  | 22 | 22  | 26 |     |     |     |
| F10 | 22  | 21  | 93 | 27  | 36 | 22  | 22 | 23  |     |     |
| F11 | <20 | <20 | 35 | 28  | 30 | <20 | 21 | <20 | 35  |     |
| F12 | <20 | <20 | 35 | 28  | 30 | nd  | 21 | <20 | 35  | 99  |

**PyoF14**

|                 | F1 | F2 <sub>2</sub> | F4  | F5  | F6 | F7 | F8 | F9 | F10 | F11 | F12 |
|-----------------|----|-----------------|-----|-----|----|----|----|----|-----|-----|-----|
| F2 <sub>2</sub> | 31 |                 |     |     |    |    |    |    |     |     |     |
| F4              | 31 | 100             |     |     |    |    |    |    |     |     |     |
| F5              | 31 | 100             | 100 |     |    |    |    |    |     |     |     |
| F6              | 98 | 33              | 33  | 33  |    |    |    |    |     |     |     |
| F7              |    |                 |     |     |    |    |    |    |     |     |     |
| F8              | 38 | 46              | 46  | 46  | 38 |    |    |    |     |     |     |
| F9              | 37 | 43              | 43  | 43  | 37 |    | 84 |    |     |     |     |
| F10             | 38 | 47              | 47  | 47  | 38 |    | 90 | 82 |     |     |     |
| F11             | 31 | 100             | 100 | 100 | 31 |    | 46 | 43 | 47  |     |     |
| F12             | 37 | 47              | 47  | 47  | 37 |    | 88 | 81 | 98  | 47  |     |
| F2 <sub>1</sub> | 48 | 28              | 28  | 28  | 48 |    | 23 | 27 | 25  | 28  | 26  |

**PyoF12**

|     | F1  | F2  | F4  | F5  | F6  | F7  | F8  | F9  | F10 | F11 |
|-----|-----|-----|-----|-----|-----|-----|-----|-----|-----|-----|
| F2  | 25  |     |     |     |     |     |     |     |     |     |
| F4  | <20 | <20 |     |     |     |     |     |     |     |     |
| F5  | <20 | <20 | 19  |     |     |     |     |     |     |     |
| F6  | 20  | <20 | 25  | <20 |     |     |     |     |     |     |
| F7  | 28  | 24  | 22  | <20 | <20 |     |     |     |     |     |
| F8  | 73  | 26  | <20 | <20 | <20 | 26  |     |     |     |     |
| F9  | 21  | 20  | nd  | 20  | <20 | 23  | 23  |     |     |     |
| F10 | <20 | <20 | 96  | 21  | 25  | <20 | <20 | <20 |     |     |
| F11 | <20 | 23  | 21  | 24  | 23  | <20 | <20 | <20 | 23  |     |
| F12 | <20 | 23  | 21  | 24  | 23  | <20 | <20 | <20 | 23  | 99  |

**PyoF15**

|                 | F1 | F2 <sub>2</sub> | F4 | F5  | F6 | F7 | F8  | F9 | F10 | F11 | F12 |
|-----------------|----|-----------------|----|-----|----|----|-----|----|-----|-----|-----|
| F2 <sub>2</sub> | 68 |                 |    |     |    |    |     |    |     |     |     |
| F4              | 68 | 98              |    |     |    |    |     |    |     |     |     |
| F5              | 66 | 99              | 96 |     |    |    |     |    |     |     |     |
| F6              | 99 | 68              | 68 | 66  |    |    |     |    |     |     |     |
| F7              | 53 | 41              | 41 | 41  | 55 |    |     |    |     |     |     |
| F8              | 89 | 68              | 68 | 66  | 91 | 46 |     |    |     |     |     |
| F9              | 76 | 61              | 61 | 59  | 77 | 49 | 84  |    |     |     |     |
| F10             | 91 | 68              | 68 | 66  | 92 | 49 | 99  | 84 |     |     |     |
| F11             | 66 | 99              | 96 | 100 | 66 | 41 | 66  | 59 | 66  |     |     |
| F12             | 89 | 68              | 68 | 66  | 91 | 46 | 100 | 84 | 99  | 66  |     |
| F2 <sub>1</sub> | 60 | 52              | 52 | 52  | 60 | 45 | 58  | 55 | 63  | 52  | 58  |

**FIG S1** Pairwise identities among F-type pyocin proteins encoded at the 3'-end of the operon. All against all pairwise percent identities for the indicated proteins are shown. Based on the comparison of homologous proteins encoded within this region, F-type pyocins were classified into 11 distinct groups, of which 6 groups were experimentally tested (F1 through F7). The F-pyocin groups of the proteins that are being compared are indicated at the sides and top of each table. Numbers that are shaded denote groups that share Specificity Modules. The PyoF10 comparisons include only the C-terminal 60 amino acids. PyoF13 comparisons include only the last 210 residues of these proteins. The F7 group does not encode PyoF14, so these boxes are left blank. "<20" denotes sequences that could not be well aligned in a pairwise alignment. F21 and F22 refer to the duplicated PyoF13, PyoF14, and PyoF15 proteins encoded in the F2 group.

## a PyoF11

```

F1 -MSYGLRLRNA-AGSILMELTIGOSARTIVYRQSLGAIINGMIV-TVPGFDPARG-VVFI IASGN---EFGVEV---
F2 MSYIGLRLIYRE-NGTAAVDITDRALRVVYSRVDVAVSKGEAA--TPGFGPNNASVYVIGDEHNKR PVVWARM---
F4 -MTTGLQIWDANGLNTDTATRVGTILGSVES-GTSPGSI S--VPDLSLGNP-FCYVLTGAS---VYGDV---
F5 -VIVGLRVRDVSSTGQVTVVTRDLRTVIGTFNT-GTASGLT--VSDFSSGSGWACILEAPRPSLNIANNY---
F6 -MFAGLQVFNAG-AGGVVMDTNIPIYAKLLGI VESTGTNNQVDT--VSMFESGQP-FAVVPSPAYTPGQYWSF---
F7 -MSHGFRFYDA-QGDLMDSSSRFSRVFRAQVFP IENGRYD-L PSTYDSSLGDLFFF--TG YRDDGWGL---

F8 -MSYGLRLRNA-AGSILMELTIGOSARTIVYRQSLGAIIDGMIV-TVPGFDPARG-VVFI IASGN---AYAEV---
F9 -MTVGLRLRDARTGTSKLDIGDFTVSVVYQEEIIVQLPGRVE--VPGVNPTEYGAFFI PPS-YGSSVYRYM---
F10 -MTAGLQIWDANGLNTDTATRVGTILGSVES-GTSPGSI S--VPDLSLGNP-FCYVLTGAS---VYGDV---
F11 -MMATFIIRDRLTGRVKVDSLRSRITKQLGII ST-GNSAGSI V--VPEFSSGSPWWSWIPDIEF--VTFNL---
F12 --MATEFIIRDRLTGRVKVDSLRSRITKQLGII ST-GNSAGSI V--VPEFSSGSPWWSWIPDIEF--VTFNL---

KS9 -MNTGLQIFDG-AGRVILDARSRAGR VVGIAWT-GGGDGRVA--ADMSSGGE PFWFSFMPARI FYRVSGAEP---
BcepGomr -MAFGRLRYDG-GGGLLLNATPNLGRILGVTAVGG--DSSLQ--NGQFVGVRPWFHV--QAFNTDNGML---
T1 -MAYGISI WDA-NG-VYNNYGIKPI TVVGNF--SAGQNS-----ASFYQVPPQMHNVI I SLDGG
N15 -MTWG IQTWDA-NGNPN-NYGIKPVSVGRIP L--SEGQNS-----GSWSFAI PAGMKVGF AVSLDKG
LUZ7 -MPAGLQITFS-NGALWFDMERLCOVYTFST-GTISGFT--IP-VGSGT PVLVTVADSNRI I VNSTQTVA
LIT1 -MSYGFRFYDA-DGNVTV DSTNKSFRSVYRQVFP TLQAGYTPMPPGFDNPT-DFFFLTWFHLPDPWPRF---

F1 -----PRYTISGSVVTIF--HWN-----GSSGTIYVLHAVMFS
F2 -----GDGVVQWGYEDW--WF-----SLFHTSGTLYVVAKV--
F4 -----IPPSVTFSGNTLSW--GFY-----GGGSYTVRVS AKI VYGVF--
F5 -----RYPRVRI SGDV I SW--DFP-----GPYASWLAVACDVI YGVY--
F6 -----FNYPMVEI SGGT LKW--VFYD--FYAGTGGGTRWPCKI VYGIY--
F7 -----APEYT-----WLPGWKYI I WRSGGSQGGPARHWI NVVSTR--

F8 -----PLYTISGNVVTIF--HWY-----GSSGTIYVLHAVMFS
F9 -----PWVKVETGSSVWV-------TLASDGGKVPWLL I VVRYR-
F10 -----IPPSVTFSGNALS W--GFY-----GGGSYTVRVS AKI VYGFIF--
F11 -----PSITVSGNTLSW-------STPPRSI SIVYGIY--
F12 -----PSITVSGNTLSW-------STSPRSI SIVYGIY--

KS9 -----SP I I A I DRNGVSW--RYSG--NTSGSNAYTQVPGWIVYGVY--
BcepGomr -----PEVWMSGT I LNW--KYN--L SGGVS--PATVYI FYGIY--
T1 A I SGPGRKI I A SGN I T V--TPT--NSPGPNVY P SNOYL I AYLEND
N15 AVS-VGRRIVASGNIT I L--SAA--SSVGI GNYPASECEL I VYVEKA
LUZ7 I Y T P D V S Y D P A T R I V S W--FFT--GVNVGRQ P L R I V G Y F--
LIT1 -----VDESEFINQIRWLD DFA-----PTYGRAYLNVV SFR--

```

## b PyoF12

```

F1 -MSYGVLLIRGDAQQT I I D D S N P C I H F A A S G T Y G H---T T R E T V I Q Y A F P I -Q S P Y E P Y V F -V R P N G P H Q I Y L F R---H I G A P C N W-----T C F A F W
F2 MSYGVLLVRNGLQIT I V I D G E F H N L S L L L E R N I E V---E T S O W F S L D F P Y A V -T S A A P V L A V Q A W K N K I L Y F D S V Q---Y R G G P G N W-----T G---A
F4 -M I A G L Q I F N D C N T I Q F D D N Y H A P I L I N K S T V S V R Q -R R P A P Y D A G S G A L E V F A K D P L L F M G N T Y G G A V T---V S S R E E V Y-----S G F -W
F5 -M M L G F K A R N T E K I L V I D S S Y Q N L Q M A K G T L T T S K L D S G I G Y A D V V V P---S G R A S A V L A I R W N G T A G E Y---P Q S S G Y V W-----K K L D A I
F6 ---M F Q C F E N E N I Q F D A N L M S Y G F R E K H E V L G V -A N E H T G F L T F I V D V -F R P V A R M L F -V H R S D N D P Y T K E F---A Y S R V E Y L-----T G L W R F
F7 -M T Y G V R L V N D W Q I N I D D N N I Y Y V V Q E G V T Q---T V K Y P N S I V E D E N Y R N I Q T P L V F -V K P N T G G Q L C M L L K Y F G S A G N W-----Q G G E W I

F8 -M S Y G V L L I R G G S Q Q T I I D D S N P C I H I A T S G T Y G V---Q T S S E T I V S P S A I -Q S R Y E P Y V Y -F R P D G P H Q V F R---H L G R P G N W-----T C F A F W
F9 M M P V G F R V R G S A Q I Q I S D A S N Y M V T R Q G G F D S S N Y V L G D D H V A F S K P I -N A V E P P L I F -L R F N S A Y V M M G G F S---H L G R P G E W-----T G F S M W
F10 --M A G L Q I F N D Y N T I Q F D D N Y H A P I L I S K S T V S V R Q -R R P A P Y D A G S G A L E V F A K D P L L F M G N T Y G G A V T---V S S R E E V Y-----S G F -W
F11 --M A R V I V R N P S G A V V I D D S F N T A L K A K A V T T A N D G N C V I S A V S H T A I S S R L P I L A L-----S N Q L V Y L-----S K V Q R N
F12 --M A R V I V R N P S G A V V I D D S F N T A L K A K A V T T A N D G N C V I S A V S H T A I S S R L P I L A L-----S N Q L V Y L-----S K V O R N

KS9 -M P A G F Q A F T D T G V Y Q I D G L T N Y Q V V Q A M S A Q A V---D T S L R L A T N D A G K T F N V T L P S V A F A F N A T A G P M Y G-----V Y A S D G V G-----I T I -W
BcepGomr -M T F G F R L T G D S G Y W Q V D E N N P O L F L V N V Y T L S R---P S S I N A F S P I D I A G E M P I P-----V I H S P D T W A A M Y R I Q Q T G S N T W
T1 -M S Y G A F I D V -N G N P F I T P L S P F A L Y A R G E I Q S V N -V S G S Q V A E R Y V R I I -P T G V P V I A F -C K T T N T Q Q G T---A L S A F T F R-----P S G N V G
N15 M A D Y G A L I A L E N G N P F I T P Q S T P F C L Y R K V V N S V -A N G A Y H A G A T A L D A S Y P A M V F -C K T S D T A Q---P T T V G A T R-----S G---C
LUZ7 -M P A G F Q V Y S L N G N V L M A T S D X S N M A Y Q R T---V R L P S R N P F I H N I D V V G E Y P V I V L K Q T Y H P S G Y V F R---V A E V N R Q K-----I N A T T W
LIT1 -M T Y G I K L I N D N D I C I D E M N R V Y V V V H E G T Y K Y D S -P G Q D Y I Y I Q F P T R I -R Q S L P I F F -A K Q D G P H G F T D F L---W F G S N G N W-----T G C R F V

F1 Q T I Y---R D V D P P I Y G -G K W K A G A V M L P K T---G W G M Q V F D S Q S R -V M F D S N R D I V Y V G G A Q V W N K Y S N P S W P C G M A-----L Q T W Y L F T
F2 T L S F---S E Y G H T S G S V R I R V Y A Y A L P L L---R G Y G L R V R N S A G S -V V F D S L R L P L V F S A E L G A P E D W R V R S G E P I I G A G R I D I Y R P A T W Q---
F4 R F T L---V A D S F S G -T D A D V Y F D N A P P---Q S S G F L Q I Y K P D G I T L F D S G S K Y L R L S-----D V L Q A S S G I-----T S F S L P S G
F5 T F R V---Y A G S P S V Q A T F D Y F L C T P I Q T---E C G V I G L R I R N S S C G G V Y D S R Y K Y L R V L-----D Y I N E T L A V D G V F S K A Y P -G K K V A L I Q T
F6 Q Y C C---A W I P S M T---R K L M V Y I F D R M Q V---G G N F L Q T F D T A G N -I T F N T N Q I P L R I A-----G M Y S P P A I V N S N G S A Q L P -T T T W T L P P P
F7 T T T V---P G A A P G V V G -G R Y K V V V P F M P K S---T W G M H V M D S A G Q -I V F D S G Y K P A I F T G G S Q Y W T Y Y A W N P N P P G G G S G-----V N S W Q S V P G

F8 Q A Y I---L G S E P P I Y G -G K W K A G A V M L P K T---G W G M Q V F D S Q S R -V M F D S N R D I V Y V G G A Q A W N K Y A Y P N Y A G G P-----L Q V Y L D F P
F9 L G W V N E N G S G I A P M R C S -G D W F A A S T K V E K S---N E L V G I R I R N G K S G E I Y D S G Y P L V K F L-----S Q E S N F T P A G R I-----H H W L I Y K V
F10 R F A L---V A D S F S G -T D A D V Y F D N A P P---Q S S G F L Q I Y K P D G I T L F D S G S K Y L R L S-----D V L Q V S S G I-----T S F S L P P P
F11 G T S V---S W K V A T Q S E -G S V S Y I F D D P S---T S A A G S L V L R N A A T D V I T F D S D L D Y L K V V-----G V Y T P K T G-----V A I Y Q L P P P
F12 G T S V---S W K V A T Q S E -G S V S Y I F D D P S---T S A A G S L V L R N A A T D V I T F D S D L D Y L K V V-----G V Y T P K T G-----V A I Y Q L P P P

KS9 S T D F D R A T Y T L R F V T E R P C T V Y F F Q F D Q V P P---A S G N F G L Q V F N G Q G R -L I A D S S K P F L R V L-----D V I Y N E Y V P G D G-----W M V A G W
BcepGomr S C Y F---I S R D N P---V N F Y V Y L F D R I P A G G A R A N W S L N V Y G P D R -L N F A G D R K Q P V-----N F V P Q Q I G S T T D P Q G G V T V P N G K W G A V D
T1 T V Y I---R E T N P A N Q S -Y T L T Y I F A I F E Q---S L P R W G M A I W D A S G K -L V L T N E T K V L S D L-----V T I G T P Y A G G G L N I D T T L S G S Y A V V P T
N15 N I V L---G S S P Y Q A -H L T A Y I F A I Y P O---T L P K W G F A I W D A T G K -L V L T N E S R I L S D L-----V T V G S P G S T T G G I N I D V T L P C S Y A V A P
LUZ7 R I G L---C T E M F P D N S A W A D V L I Y G S A A D M S---I N Q N A C Q V F K A D Q K -L A F S D R L P Y L V H-----S T H Q V P N Y G T G S H E F T V T N C G I M M T T
LIT1 L T N F---L M S P S V Y S -G K Y K I V A I H M P K T---A G W L Q V F D G D G N -G V F D T G Y K P A V E L G A I Q R F A R Y G W N P N F P C G R S L-----A S W W A D A T K

```

**FIG S2** Protein sequence alignments of PyoF11 and PyoF12 from each F-type pyocin group. (a) An alignment of PyoF11 homologs is shown from the 11 F-type pyocin groups and selected phages. (b) An alignment of PyoF12 homologs is shown from the 11 F-type pyocin groups and selected phages. The phage proteins are from *Burkholderia* phages KS9 (NC\_013055) and BcepGomr (NC\_009447); *P. aeruginosa* phages LIT1 (NC\_013692) and LUZ7 (NC\_013691); and *E. coli* phages T1 (NC\_005833) and N15 (NC\_001901).



**a****PyoF13 N-terminal region**

```

F1 MAWYSTGTVAVTLNSPTVGTGTAFSANARVGDAFRGPDGRWYEVTNVASSTVISIKPNYQGSTASGQPYA
F21 MAWHSKGSVSVTLNSEAVLGNATDFIANVRTGDAFRGPDGRWYEITNVTSATVISIKPNYQGATASGQVYA
F22 MPWYSTGTVSVVLSNDTVTGSGTAFSANARAGDAFRGPDGRWYEIGNVASATVLTIKPAYQGATANGQAYS
F4 MAWYSAGTVAVTANSPVTGTGTQFSSNARVGDAFRGPDGCWYEVTNVASSTVISIKPNYQGSTASGQPYA
F5 MTWYSSGTVAVTANSPVTGTGTQFSSNARVGDAFRGPDGCWYEVTNVASSTVISIKPNYQGSTASGQPYA
F6 MSWYSAGTVAVTANSPVTGTGTQFSSNARVGDAFRGPDGCWYEVTNVASSTVISIKPNYQGSTASGQPYA
F7 MPWYSTGTVSVVLSNDTVTGSGTAFSANARAGDAFRGPDGRWYEIGNVSSATVLTIKPAYQGATANGQAYS
F8 MAWYSTGTVAVTLNSPTVGTGTAFSANARVGDAFKGPDGRWYEVTNVASSTVISIKPNYQGSTASGQPYA
F9 MPWYSTGTVSVVLSNDTVTGSGTAFSANARAGDAFRGPDGRWYEIGNVASATVLTIKPAYQGASATAQAYS
F10 MAWYSAGTVAVTANSPVTGTGTQFSSNARVGDAFRGPDGRWYEVTNVASSTVISIKPNYQGSTASGQPYA
F11 MVWYSTGTVAVTANSPVTGTGTQFSSNARVGDAFRGPDGRWYEVTNVASSTVISIKPNYQGSTASGQPYA
F12 MVWYSTGTVAVTANSPVTGTGTQFSSNARVGDAFRGPDGCWYEVTNVASSTVISIKPNYQGSTASGQPYA

F1 VAPILGYDKDLSDRFNQIAMDWGATLAGIKPWALSNLTGTQAQADMGMTAVGRGLNAAATAENALSFIFG
F21 VVPIHGYSKNLADQFRDINNQWGATLAGIKPWAVSSTGQQAQADMGIISAVGRA LNNASTPANALS YLG
F22 ITPVQGYSKTLADQFRDLSNQWGSLLAAVKPWAIAS TGSQAQADMGI TEVGRAINGASTVGNALGFLG
F4 VAPILGYDKDLSDRFNQIAMDWGATLAGIKPWAIAS TGSQAQADMGI TEVGRAINGASTVGNALGFLG
F5 VAPILGYDKDLSDRFNQIAMDWGATLAGIKPWAIAS TGSQAQADMGI TEVGRAINGASTVGNALGFLG
F6 VAPILGYDKDLSDRFNQIAMDWGATLAGIKPWALSNLTGTQAQADMGMTAVGRGLNAAATAENALSFIFG
F7 ITPVQGYSKALADQLRDLNNQWGSLLAAVKPWATAA TGAALDDMGFGV TGKALAVSATPVAARSA LG
F8 VAPILGYDKDLSDRFNQIAMDWGATLAGIKPWALSNLTGTQAQADMGMTAVGRGLNAAATAENALSFIFG
F9 ITPVQGYPKALADQFRDLSNQWGSLLAAVKPWAIAS TGSQAQADMGI TEVGRAINGASTAANALRYLG
F10 VAPILGYDKDLSDRFNQIAMDWGATLAGIKPWALSNLTGTQAQADMGMTAVGRGLNAAATAENALSFIFG
F11 VAPILGYDKDLSDRFNQIAMDWGATLAGIKPWAIAS TGSQAQADMGI TEVGRAINGASTVGNALGFLG
F12 VAPILGYDKDLSDRFNQIAMDWGATLAGIKPWALSNLTGTQAQADMGMTAVGRGLNAAATAENALSFIFG

```

**b****PyoF13 C-terminal region**

```

F1 GM-PKSMNSLRRAVSDANNV PN--ECGFYGI GAS P WANLPPGV DGI NPI--GSMLYHHPYDVSTAVQMLI PR TSDL--MYFRRK L
F21 GVA PNQMGWAGNAMNTADLDS LTVSGLYAHGT---AVPSPV NNAQ---GYVLHMQHGNP DFAVQ QWYQLNSA T--GQYMR IKA
F22 GV-SKTQAPMALDMDTVN----ESGWFSI TPNTY--NVPLGNNNI SGVNGHVALSMVFDAS TRYQLFFVRNTNLP EVWYRSC T
F4 GV-SKTQAPMALDMDTVN----ESGWFSI TPNTY--NVPLGNNNI SGVNGHVALSMVFDAS TRYQLFFVRNTNLP EVWYRSC T
F5 GV-SKTQAPMALDMDTVN----ESGWFSI TPNTY--NVPLGNNNI SGVNGHVALSMVFDAS TRYQLFFVRNTNLP EVWYRSC T
F6 GM-PKSMNSLRRAVSDANNV PN--ECGFYGI GAS P WANLPPGV DGI NPI--GSMLYHHPYDVSTAVQMLI PR TSDL--MYFRRK L
F8 GM-PKSMNSLRRAVSDANNV PN--ECGFYGI SVG P YSNLPPGIDALNP--GSMLYHQPYDVA TAVQLFV PR TSN I--LYFRRK I
F9 GV-TSQMAFRSYADSNALPN--ECGFFG IGLGVPWANLPPGIDALNP I--GSAIYQNVYDASTAYQLFV PR TSN I--LYFRRK V
F10 GM-PKSMNSLRRAVSDANNV PN--ECGFYGI SVG P WANLPPGIDSLNPIV--GSMLYHQPYDASTAVQMF IAR TSDL--AYFRRK A
F11 GV-SKTQAPMALDMDTVN----ESGWFSI TPNTY--NVPLGNNNI SGVNGHVALSMVFDAS TRYQLFFVRNTNLP EVWYRSC T
F12 GM-PKSMNSLRRAVSDANNV PN--ECGFYGI SVG P WANLPPGIDSLNPIV--GSMLYHQPYDASTAVQMF IAR TSDL--AYFRRK A

F1 SGNWSAWRFLLSDKQLVGTVSD--GSNV P NGAVM QNGTTA INVG TSLR FADGTQI IYAK L-----RLEFSA-VDI
F21 GGNWSRWLQYSQFNLVGLASFD-ASNNPSGAI IQRGGTVGF--NEYVR YADGTQICWGN TTTNVGATMAYQPAG TLSFYITP
F22 NGTWKEWRFYITDNI VGSVTRRLV TGKPTGAVM ESGTTSN---GWYVR FADGTQMAAAAS-----EPGLSF----
F4 NGTWKEWRFYITDNI VGSVTRRLV TGKPTGAVM ESGTTSN---GWYVR FADGTQMAAAAS-----EPGLSF----
F5 NGTWKEWRFYITDNI VGTVTRRLV TGKPTGAVM ESGTTSN---GWYVR FADGTQMAAAAS-----EPGLSF----
F6 SGNWSAWRFLLSDKQLVGTVSD--GSNV P NGAVM QNGTTA INVG TSLR FADGTQI IYAK L-----RLEFSA-VDI
F8 AGAWQPWWFLLSDAQLLGVAQS--GGVPLGSI LRGNNAN---GQYSR FADGTQTC TVSL-----LGANDR-LAG
F9 AGNWQAWRFLMSDAQLLGVAQS--GGAP IGA I M ERG SNAN---GQYER FANGTQVCTVSL-----LGANDR-VAG
F10 AGTWS TWMRF L TDRQLSGTVSNG--GSV P NGA I IQRG SNVN---GEYAR FADGTQICWRRY-----AAALDV INSGSLF-ITP
F11 NGTWKEWRFYITDNI VGTVTRRLV TGKPTGAVM ESGTTSN---GWYVR FADGTQMAAAAS-----EPGLSF----
F12 AGTWS TWMRF L TDRQLSGTVSND--GSV P NGA I IQRG SNVN---GEYAR FADGTQICWRRY-----AAALDV INSGSLF-ITP

F1 LTRQYTFPMSFFEPPNVTA TL I QGQQSDINPLQFQQLGPVLVAATTVSACNVRVMRPTIYVSSGWASGNFIDCSVNAVGRWR
F21 VAYSWGFPVFSRPPSVMVNP MRAA-----GNNASRPWGSTMSVTE LFSWYGYDTASVASGMAAS-----YVAMGRWN
F22 GANVIQLPAA FVTGFNTGVT C-----NWI P SSGWPATAGQGV RGAYLNGSSSVS FATAQALGANDTI TVMAVGRWY
F4 GANVIQLPAA FVTGFNTGVT C-----NWI P SSGWPATAGQGV RGAYLNGSSSVS FATAQALGANDTI TVMAVGRWY
F5 GANVIQLPAA FVTGFNTGVT C-----NWI P SSGWPATAGQGV RGAYLNGSSSVS FATAQALGANDTI TVMAVGRWY
F6 LTRQYTFPMSFFEPPNVTA TL I QGQQSDINPLQFQQLGPVLVAATTVSACNVRVMRPTIYVSSGWASGNFIDCSVNAVGRWR
F8 QGYTLPLPATFTIDWTVGVST-----SW-ASHSINPTIASNGIRVAYANG-NALTFILTENLGTNRLI-FSCIGRWF
F9 QGYTLPLPATFTIDWTVGVSV-----SW-ASHSINPTIASNGIRVAYANG-NALTFILTENLGTNRLI-FSCIGRWF
F10 GGTTLTFPAA FVSA PVVSDA TIRN-----TGYSGRGWGAVYSVDA TSCAWYGFSTTSAL AALLPG-----FIATGRWF
F11 GANVIQLPAA FVTGFNTGVT C-----NWI P SSGWPATAGQGV RGAYLNGSSSVS FATAQALGANDTI TVMAVGRWY
F12 GGTTLTFPAA FVSA PVVSDA TIRN-----TGYSGRGWGAVYSVDA TSCAWYGFSTTSAL AALLPG-----FIATGRWF

```

**FIG S3** Protein sequence alignments of PyoF13 from each F-type pyocin group. (a) An alignment of the N-terminal 140 amino acids of PyoF13 homologs from the 11 F-type pyocin groups is shown. (b) An alignment of the C-terminal 210 amino acids of PyoF13 homologs from the 11 F-type pyocin groups is shown.



**a**

```

R1 MTTNTPKYGGLLTDI GAAALAAAS AAGKKWQP THML I GDAGGAPGDTPDPLPSAAQKSLI NQRHR
R2 MTTNTPKYGGLLTDI GAAALAAAS AAGKKWQP THML I GDAGGAPGDTPDPLPSVAQKSLI NQRHR
R5 MTTNTPKYGGLLTDI GAAALAAAS AAGKKWQP THML I GDAGGAPGATPDP I PAA TQTKLI NQRHR

R1 AQLNRLFVSDKNANTLVAEVVLPVEVGGFWIRE IGLQDADGK FVAVSNCPPSYKAAMESGSARTQ
R2 AQLNRLFVSDKNANTLVAEVVLPVEVGGFWIRE IGLQDADGK FVAVSNCPPSYKAAMESGSARTQ
R5 AQLNRLFVSDKNINLVAEVVLPVEVGGFWIRE IGLQDADGK FVAVSNCPPSYKAAMESGSARTQ

R1 TIRVNIALSGLENVQLLDNGI IYATQDWKEKVAADF KGRK I LAGNGLLGGGDL SADRSLGLAP
R2 TIRVNIALSGLENVQLLDNGI IYATQDWKEKVAADF KGRK I LAGNGLVGGGDL SADRSLGLAP
R5 TIRVNIALSGLENVQLLDNGI IYATQDWKEKVAADF KGRK I LAGNGLVGGGDL SADRSLGLAP

R1 SGVTAGSYRSVTVNANGVV TQGSNPTTLAGYAI GDAYTKADTDGKLAQKANKATTLAGYGITDAL
R2 SGVTAGSYRSVTVNANGVV TQGSNPTTLAGYAI GDAYTKADTDGKLAQKANKATTLAGYGITDAL
R5 SGVTAGSYRSVTVNANGVV TQGSNPTTLAGYAI GDAYTKADTDGKLAQKANKATTLAGYGITDAL

R1 RVDGNAVSSSRLAAPRSLAASGDASWSVTFDGSANVSAPLSLSATGVAAGSYPKVTVDTKGRVTA
R2 RVDGNAVSSSRLAAPRSLAASGDASWSVTFDGSANVSAPLSLSATGVAAGSYPKVTVDTKGRVTA
R5 RVDGNAVSSSRLAAPRSLAASGDASWSVTFDGSANVSAPLSLSATGVAAGSYPKVTVDTKGRVTA

R1 GMALAAATDIPGLDASKLVSGVLAEQR LPVFARGLATAVSNSSDPNTATVP LMLTNHANGPVAGRY
R2 GMTLAAATDIPGLDASKLVSGVLAEQR LPVFARGLATAVSNSSDPNTATVP LMLTNHANGPVAGRY
R5 GMALAAATDIPGLDASKLVSGVLAEQR LPVFARGLATAVSTTSDPNTATVP LMLTNHANGPVAGRY

R1 FYIQSMFYPDQNGNASQIATSYNATSEMYVVRVSYAANPSIREWLPWQRCDIGGSFTKTT
R2 FYIQSMFYPDQNGNASQIATSYNATSEMYVVRVSYAANPSIREWLPWQRCDIGGSFTKEA
R5 FYIQSMFYPDQNGNASQIATSYNATSEMYVVRVSYAANPSARDWLPWKRCDIGGSFSKEA

```

**b**

```

R1 DGS I GNGVNI NS FVNSGWLQSTS EWAAGGANYPVGLAGLLIVYRAHADHIYQTYVTLNGST - Y
R2 DGE L PGGVN LDS MV TSGWWSQSFTAQAASGANYP I V RAGLLHVYAASNFIYQTYQAYDGE SFY
R5 DGALGGAVNLNSLI TSGWVYQTANAQAESGANYPVPRAGLLQVHNAGTNFIYQTYQVYDGE GFY

R1 SFRCCYAGSWRPFWRQNWDDGNFDPASYLPKAGFTWAALPGKPATFPFSGHNDTTSQITSGILPLA
R2 FRCRHSNTWFPWRRMWHGGDFNPSDYLLKSGFYWNALPGKPATFPFSAHNDVGGQLTSGILPLA
R5 FRCRYTNTWYPWRRVWHGADFNPNDYLLKSGFTWAALPGKPATFPPTGHNHDAAQITSGILPLA

R1 RGG LGANTAAGARNNI GAGVPATASRALNGWVKDNDTGLIVQWQVNVGDHPGGI IDRTLTFPI
R2 RGGVGSNTAAGARSTI GAGVPATASLGASGWRDNDTGLIRQWQVTC - - - PAD - ADASITFPI
R5 RGG LGSNTAAGARNNI GAGVPA TANRSLNGWVKDNDTGLIVQWMTVSVGDHPGGIVNRSITFPI

R1 AFPSACLHVVP T - VKEVGRPATASASTVTVADVSVSNTGCVIVSSEYYGLAQNYGIRVMAIGY
R2 PFP TLCLGGYAN - QTSAFHPGTDAST - - - - GFRGATTTTAVIRNGYFAQA - - - VLSWEAFGR
R5 AFP TTCLHVVP S - VKELGRPATASASTVTLADVSVSTTGCVIVA TEYHGAVQNYAIRLVAIGC

```

**c****N-terminal region****Pairwise % identities**

|    | R2 | R5 |
|----|----|----|
| R1 | 99 | 96 |
| R2 |    | 96 |

**C-terminal region****Pairwise % identities**

|    | R2 | R5 |
|----|----|----|
| R1 | 53 | 70 |
| R2 |    | 61 |

**FIG S4** Protein sequence alignments of the tail fiber proteins (PyoR6) from each R-type pyocin group. (a) An alignment of the N-terminal 450 amino acids of the PyoR6 homologs is shown. (b) An alignment of the C-terminal 250 amino acids PyoR6 homologs is shown. (c) The pairwise sequence identities of the PyoR6 N-terminal and C-terminal regions are shown. The locus tags for the proteins shown are R1 (PLES\_06171), R2 (PA14\_08050), and R5 (PA0620).

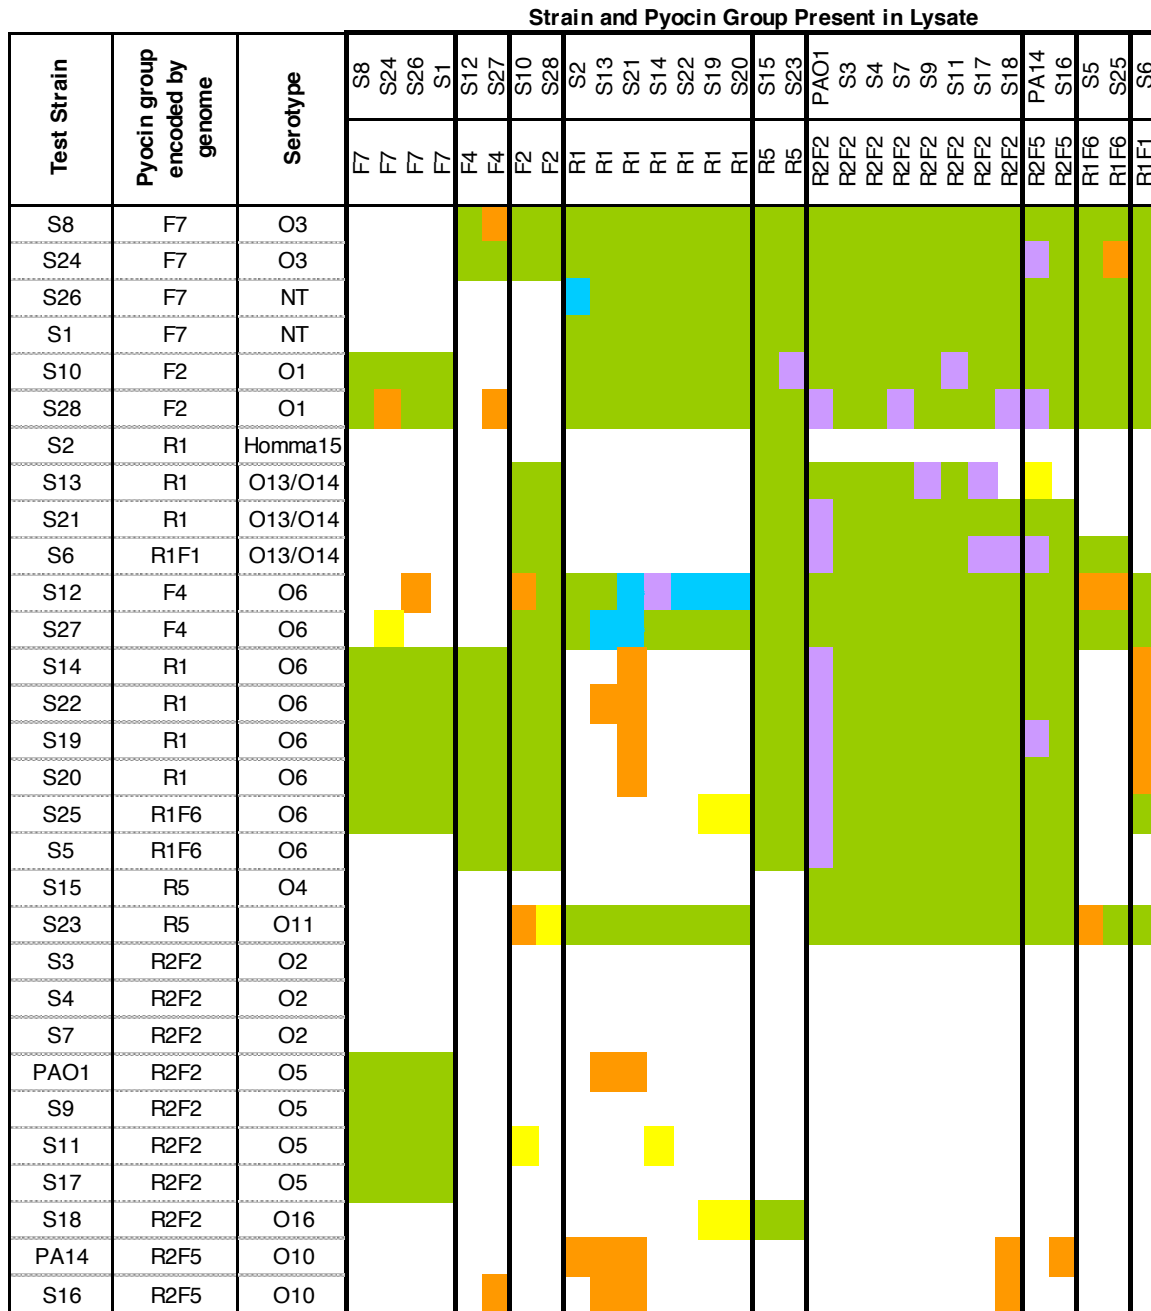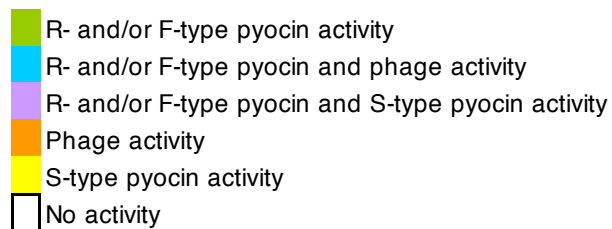

**FIG S5** The bactericidal activity of all F-type pyocin lysates tested on all of the strains used in this study. All lysates were spotted both on plates containing proteinase K and plates without proteinase K. Conclusions about pyocin types within each lysate were derived from examination of both plates. In lysates containing R- or F-type pyocin activity, S-type pyocin activity may not have been detectable in some cases because R- and F-type activity tended to be stronger and could mask the S-type activity. "NT" denotes a non-typeable serotype.
